## RESEARCH ARTICLE

# Intrinsic anti-inflammatory properties in the serum of two species of deep-diving seal

Aranya Bagchi<sup>1</sup>, Annabelle J. Batten<sup>1</sup>, Milton Levin<sup>2</sup>, Kaitlin N. Allen<sup>1,3</sup>, Michael L. Fitzgerald<sup>4</sup>, Luis A. Hückstädt<sup>5</sup>, Daniel P. Costa<sup>5</sup>, Emmanuel S. Buys<sup>1</sup> and Allyson G. Hindle<sup>1,\*</sup>

## ABSTRACT

Weddell and elephant seals are deep-diving mammals, which rely on lung collapse to limit nitrogen absorption and prevent decompression injury. Repeated collapse and re-expansion exposes the lungs to multiple stressors, including ischemia–reperfusion, alveolar shear stress and inflammation. There is no evidence, however, that diving damages pulmonary function in these species. To investigate potential protective strategies in deep-diving seals, we examined the inflammatory response of seal whole blood exposed to lipopolysaccharide (LPS), a potent endotoxin. Interleukin-6 (IL6) cytokine production elicited by LPS exposure was 50 to 500 times lower in blood of healthy northern elephant seals and Weddell seals compared with that of healthy human blood. In contrast to the ~6× increased production of IL6 protein from LPS-exposed Weddell seal whole blood, isolated Weddell seal peripheral blood mononuclear cells, under standard cell culture conditions using medium supplemented with fetal bovine serum (FBS), produced a robust LPS response (~300×). Induction of *Il6* mRNA expression as well as production of IL6, IL8, IL10, KC-like and TNF $\alpha$  were reduced by substituting FBS with an equivalent amount of autologous seal serum. Weddell seal serum also attenuated the inflammatory response of RAW 267.4 mouse macrophage cells exposed to LPS. Cortisol level and the addition of serum lipids did not impact the cytokine response in cultured cells. These data suggest that seal serum possesses anti-inflammatory properties, which may protect deep divers from naturally occurring inflammatory challenges such as dive-induced hypoxia–reoxygenation and lung collapse.

**KEY WORDS:** Innate immunity, Cytokine, IL6, Endotoxin, Pinniped

## INTRODUCTION

Marine mammals such as pinnipeds (seals and sea lions) are highly specialized predators that pursue and capture prey while breath-holding. During these dives they draw down their body oxygen stores, resulting in generalized hypoxemia and local tissue

hypoperfusion and hypoxia (Guppy et al., 1986; McDonald and Ponganis, 2013; Meir et al., 2009). They have evolved a highly compliant, collapsible lung that accommodates the tremendous pressure changes that occur during deep dives. Further, lung collapse may prevent tissue nitrogen accumulation, narcosis and decompression injury (Falke et al., 1985; Kooyman et al., 1971; McDonald and Ponganis, 2012; Ridgway and Howard, 1979). Remarkably, deep-diving marine mammals tolerate this hypoxia, pressure-induced lung collapse, and ischemia–reperfusion (IR) events without apparent harm. Although the physiology and behavior of deep divers have been explored for decades (Butler and Jones, 1997; Costa and Sinervo, 2004; Kooyman et al., 1981; Ponganis et al., 2011), only recently have we begun to examine biochemical mechanisms of cell-level protection in these unique animals.

In contrast, humans typically suffer lung injury after IR (Cheng et al., 2006) and after cyclical collapse and re-expansion of alveoli (atelectrauma) (Leite et al., 2012; Lohser and Slinger, 2015). Rapid re-expansion of a previously collapsed human lung can also produce pulmonary oedema, a phenomenon that is, in part, mediated by inflammatory cytokines (Suzuki et al., 1992). Remarkably, despite repeated trips to depths that induce lung collapse and re-expansion, diving seals do not display evidence of significant lung injury (Kooyman and Ponganis, 1998). This may in part be due to having a pulmonary surfactant with low surface activity (Miller et al., 2006a) that acts as an anti-adhesive surfactant promoting alveolar opening upon lung re-expansion (Foot et al., 2006; Gutierrez et al., 2015; Miller et al., 2006b; Spragg et al., 2004). However, the mechanisms that protect against tissue injury and/or cytokine production following atelectrauma and IR remain to be investigated. Further, it is not known whether marine mammals avoid decompression sickness or whether they have some mechanism to tolerate bubble formation (Hooker et al., 2012). Hyperbaric injury leads to cytokine-mediated inflammation in animal models (Bigley et al., 2008; Ersson et al., 1998; Wang et al., 2015). Recent studies suggest that marine mammals are likely to experience some level of decompression sickness and thus one might expect some mechanism for tolerating associated bubble formation and mediating downstream effects. A reduced inflammatory response might provide such a protective mechanism.

Species differ in their responses to inflammatory stimuli, a phenomenon that may have arisen to facilitate survival in diverse ecological niches (Okin and Medzhitov, 2012). Mice, for example, have a blunted response to various types of inflammatory challenge compared with humans (Warren et al., 2010). We therefore hypothesized that the immune response is modified in deep-diving seals to allow them to repeatedly transit to great depths without invoking inflammatory injury to the lungs, or other cells and tissues. We were particularly interested in responses of the innate immune system, which presents a generalized, fast-acting

<sup>1</sup>Anesthesia Center for Critical Care Research, Department of Anesthesia, Critical Care and Pain Medicine, Massachusetts General Hospital, Harvard Medical School, 55 Fruit Street, Boston, MA 02114, USA. <sup>2</sup>Department of Pathobiology and Veterinary Science, University of Connecticut, 61 North Eagleville Road, Storrs, CT 06269, USA. <sup>3</sup>Department of Integrative Biology, University of California Berkeley, Valley Life Sciences Building 5043, Berkeley, CA 94720, USA. <sup>4</sup>Lipid Metabolism Unit, Center for Computational and Integrative Biology, Massachusetts General Hospital, Harvard Medical School, 55 Fruit Street, Boston, MA 02114, USA. <sup>5</sup>Department of Ecology and Evolutionary Biology, University of California Santa Cruz, 130 McAllister Way, Santa Cruz, CA 95060, USA.

\*Author for correspondence (ahindle@mgh.harvard.edu)

© L.A.H., 0000-0002-2453-7350; E.S.B., 0000-0002-1763-9359; A.G.H., 0000-0002-1983-9573

response, rather than the adaptive immune system that confers long-lasting, antigen-specific protection. To investigate the nature of the innate immune response in diving seals, we measured responses to lipopolysaccharide (LPS) in seal whole blood, seal monocytes and seal serum. LPS, also termed endotoxin, is the principal component of the outer membrane of gram-negative bacteria, and is a well-established experimental challenge that induces a strong immune response in vertebrates (reviewed in Rosenfeld and Shai, 2006). In the present study, we found a significantly diminished *ex vivo* cytokine response to LPS in seal whole blood compared with the response in humans. Additional *in vitro* experiments using Weddell seal monocytes and a mouse macrophage cell line suggest that the differences in cytokine response to LPS in diving seals is derived from a yet-to-be defined component of seal serum.

## MATERIALS AND METHODS

### Sample collection

Blood samples from Weddell seals [*Leptonychotes weddellii* (Lesson 1826)] ( $n=20$ , 11 males, 9 females) were collected during October–December 2015 and 2016 in Erebus Bay, Antarctica. Adults and weaned pups were visually in good health, and a basic blood panel (iStat 6+, Abaxis, Union City, CA, USA) confirmed that blood parameters (e.g. glucose, hemoglobin concentration, blood urea nitrogen) were within the normal ranges for this population (Mellish et al., 2011). Venous blood was collected from sedated adults (2 mg kg<sup>-1</sup> ketamine, 0.1 mg kg<sup>-1</sup> midazolam hydrochloride IM induction; 0.5 mg kg<sup>-1</sup> ketamine, 0.025 mg kg<sup>-1</sup> midazolam IV maintenance dosed as needed), and weaned pups restrained by headbag, both according to previously published protocols (Mellish et al., 2011). Samples were drawn into heparinized or EDTA-coated vacutainers and kept chilled during transport to laboratory facilities (45–90 min). Whole blood and isolated monocytes were processed immediately, and exposed to LPS on-site in Antarctica. Serum, as well as LPS-exposed cells and plasma were then stored at -80°C.

Human samples were collected from  $n=3$  healthy volunteers (2 males, 1 female) under Institutional Review Board authorization (2018P000004), following informed consent. Northern elephant seal [*Mirounga angustirostris* (Gill 1866)] blood samples were collected from adult females ( $n=4$ , sampled 15 February 2017, late in the lactation period) sedated with telezol (1 mg 100 kg<sup>-1</sup> IM induction, 0.5 mg IV maintenance dosed as needed; Hückstädt et al., 2012) at Año Nuevo, CA, USA. Mouse (*Mus musculus domesticus*) blood samples ( $n=12$ , all male) were obtained during terminal procedures as part of another project. Weddell seal samples were collected under National Marine Fisheries Service (NMFS; no. 19439) and Antarctic Conservation Act (no. 2016-005) scientific permits. Elephant seals were handled under NMFS permit 19108. All animal procedures were authorized under Massachusetts General Hospital and the University of California Santa Cruz Institutional Animal Care and Use Committees.

### LPS *ex vivo* exposures and IL6 protein detection

Whole blood samples from all species were diluted in three parts RPMI medium 1640 to prevent hemolysis (11835-030, Gibco, Grand Island, NY, USA, containing 1% HEPES, 1% Na pyruvate, 1% non-essential amino acids and 1% penicillin/streptomycin), and were maintained in a CO<sub>2</sub> incubator for 4 h at 37°C with 1 to 1000 ng ml<sup>-1</sup> LPS. *Escherichia coli* lipopolysaccharide (O55:B5) was purchased from List Biologicals (Campbell, CA, USA), and prepared in phosphate-buffered saline. Plasma was separated from incubated samples by centrifugation at 4°C (3000 g), then snap-frozen. Interleukin-6 (IL6), a sensitive indicator of acute innate

immune activation by LPS, was measured in the plasma of each species with the most appropriate assay kit (Quantikine ELISA, R&D Systems, Minneapolis, MN, USA, human D6050, mouse M6000B, canine CA6000 for Weddell and elephant seals). Weddell seal IL6 has a high (99%) amino acid sequence similarity with another monachine seal (Hawaiian monk seal, *Neomonachus schauinslandi*), and cytokines have been reported to be similar among seals generally, including elephant seals (Khudyakov et al., 2017), supporting comparisons between seal species using the same Quantikine ELISA. Previous work has also validated cytokine assays for elephant seals specifically (Peck et al., 2016), supporting the use of cross-reactive commercial kits to study cytokines in seals. To expand cytokine and chemokine detection to 13 substances in Weddell seal plasma ( $n=8$  adults,  $n=7$  pups), we used a bead-based, multiplex canine panel on the Bio-Plex 200 platform (CCYTOMAG-90K, Millipore, Billerica, MA, USA), previously documented to cross-react with pinnipeds (Levin et al., 2014).

### Monocyte isolation and LPS *in vitro* exposures

Monocytes were isolated from Weddell seal buffy coats by density-dependent centrifugation through a column of Histopaque 1077 (30 min, 400 g at room temperature). The layer containing peripheral blood mononuclear cells (PBMCs) was washed, then resuspended and plated in serum-free medium (OptiMem, Gibco 31985070) and placed in a 37°C CO<sub>2</sub> incubator to allow the monocytes to adhere (~4 h). These plates were washed to remove non-adherent cells (primarily lymphocytes), and the remaining adherent cells were stimulated with increasing concentrations of LPS (1–1000 ng ml<sup>-1</sup>), provided in DMEM (Gibco 11965118, 1% penicillin/streptomycin) with 10% serum [fetal bovine serum, (FBS); 35-015-CV, Corning, Manassas, VA, USA, <20 EU ml<sup>-1</sup> endotoxin, not heat-inactivated] for 12 h ( $n=6$  adults and  $n=6$  pups, each with 3 technical replicates per dose, were initially used to determine the dose–response). Cell cultures were routinely tested for mycoplasma.

We used several manipulations of the cell culture medium in conjunction with LPS stimulation to evaluate the mechanisms of anti-inflammatory action of seal serum. We first compared the inflammatory response of Weddell seal monocytes cultured in standard conditions (DMEM, 1% penicillin/streptomycin), with commercially available serum (10% FBS) to medium supplemented with the seal's autologous serum (10% serum,  $n=8$  additional animals, 3 technical replicates in each dose×serum treatment). To address the possibility that baseline differences in serum cortisol between our wild population of Weddell seals and the controlled conditions of cell culture medium could affect responses, this experiment was repeated to supplement FBS with 10–10,000 ng ml<sup>-1</sup> hydrocortisone for 18–24 h prior to stimulation with a single LPS dose (100 ng ml<sup>-1</sup>,  $n=11$  seals×3 technical replicates per seal). These hydrocortisone doses were selected to span and exceed the range of serum cortisol levels that would exist in any marine mammals, and that have been reported in Weddell seals (Barrell and Montgomery, 1989; Bartsh et al., 1992; Liggins et al., 1979; Shero et al., 2015). Cells from all technical replicates were harvested in lysis buffer or Trizol (see below) for gene expression analyses, and a subset of samples from  $n=6$  seals (one supernatant sample from each serum condition treatment at 0, 1 and 100 ng ml<sup>-1</sup> LPS exposures) was processed to measure cytokine production using the canine multiplex assay.

### Murine RAW cell validation experiments

To test the anti-inflammatory potential of Weddell seal serum (WSS), we tested its effect, compared with FBS, on the LPS

response of a mouse monocytic cell line (RAW 264.7 cells, tested mycoplasma-free). Cells were grown overnight in six-well plates, then washed in DMEM without serum and incubated for 6 h with (1) regular medium (10% FBS) or (2) DMEM with 10% pooled, decomplexed WSS. Cells were then stimulated with varying concentrations of LPS (three technical replicates per dose  $\times$  serum treatment). A single batch of decomplexed WSS was used in this and all subsequent experiments, created by pooling archived serum from free-ranging, healthy adult Weddell seals ( $n=16$  males and females, NMFS authorization no. 18662) and abolishing protein complement activity by heat inactivation (56°C for 30 min).

To evaluate the potential for species differences in serum lipid level to interfere with the action of LPS, we conducted a separate experiment in RAW cells (three replicates per condition  $\times$  dose) using four serum conditions: (1) 10% FBS (0.37 mmol l<sup>-1</sup> triglycerides), (2) 10% FBS with lipid supplementation (0.43 mmol l<sup>-1</sup>), (3) 10% WSS (0.45 mmol l<sup>-1</sup>) and (4) 10% delipidated WSS (0.32 mmol l<sup>-1</sup>). Lipids were added to FBS based on cell culture conditions appropriate for Weddell seal primary cells (2.5% Lipid Mix 1 L0288, Sigma-Aldrich, St Louis, MO, USA; our unpublished observations; De Miranda et al., 2012), and lipids were removed from WSS by reserving the bottom, lipid-depleted layer after centrifugation at 13,000 *g* for 20 min (Fu et al., 2007). Triglyceride levels were confirmed in the four conditions (ETGA-200, Enzychrom, San Francisco, CA, USA).

### Hyperlipidemic mouse model

To examine the possibility that high lipid levels could affect inflammatory responses *in vivo*, we conducted an *ex vivo* LPS exposure experiment in whole blood samples from control ( $n=4$ ) and hyperlipidemic mice ( $n=8$ ). LDLR knock-out mice (lacking a low-density lipoprotein receptor making them susceptible to hypercholesterolemia, C57BL/6J background) were maintained on either a regular diet (control mice, Prolab Isopro RMH 3000, LabDiet, St Louis, MO, USA) or a high-fat diet (hyperlipidemic mice, 40% lipid, Research Diets Inc., New Brunswick, NJ, USA). After 20 weeks, blood samples were collected, then treated with LPS as per the *ex vivo* exposure protocol described above.

### Propidium iodide staining to detect cell viability

Viability of RAW cells cultured with FBS and WSS was examined to confirm that any observed differences in inflammatory output were not related simply to differences in cell survival. RAW cells were prepared at a constant density in six-well plates, then incubated with DMEM supplemented with either 10% FBS or 10% WSS for 6 h. The cells were then mechanically detached and stained with propidium iodide (0.5  $\mu$ g ml<sup>-1</sup>), a nuclear stain that is excluded by viable cells. The proportion of propidium iodide negative cells (i.e. viable cells) was recorded by flow cytometry. Flow cytometry was performed using a FACS Aria III machine (BD Biosciences, San Jose, CA, USA), and the results were analyzed using FlowJo software (TreeStar, Ashland, OR, USA). In all cases, the gating parameters were set to exclude doublets.

### qPCR to detect IL6 and inflammatory gene expression

Total RNA was isolated from frozen, lysed monocytes using the RNeasy mini kit (74104, Qiagen, Germantown, MD, USA) according to the manufacturer's protocol, or Trizol with chloroform/isopropanol extraction. cDNA was produced from  $n=3$  separate RNA preparations for each condition (4368813, Applied Biosystems, Foster City, CA, USA), and evaluated by real-time PCR. Weddell seal mRNA was assayed with Fast SYBR<sup>®</sup> Green Master Mix (LifeTechnologies,

Carlsbad, CA, USA). Seal *Il6* was amplified with: 5'-ACAAGTG-CGAAGACAGCAAG and 5'-CCCTCATAGTTGGCCTGGAT forward and reverse primers, respectively, and expression level was normalized to a reference gene ( $\beta$ -actin: forward 5'-GGAAATCGT-GCGTGACATCA, reverse 5'-CAGGAAGGAAGGCTGGAAGA) for each sample using the  $\Delta$ CT method. Gene expression in mouse monocytes was quantified with a Taqman qPCR system, with target genes normalized to 18S ribosomal RNA (Hs03003631\_g1, ThermoFisher, Waltham, MA, USA). Commercially available primers for mouse cells are as follows: *Il6* (Mm00446190\_m1), *TNF $\alpha$*  (Mm00443258\_m1), *Il-1 $\beta$*  (Mm00434228\_m1) and *Il10* (Mm01288386\_m1).

### Statistical analyses

Two-way ANOVA with repeated measures and multiple test correction was used to compare experimental treatments across the LPS dose-response curve (response of whole blood to *ex vivo* stimulation between species, inflammatory response of both seal and mouse monocytes in FBS versus WSS, IL6 production in normal versus hyperlipidemic mice). Sidak pairwise *post hoc* comparisons were used to examine any interaction between factors (across the dose-response curve) when global *F*-tests for the interaction term in the two-way models were significant. An effect of hydrocortisone treatment on a constant LPS exposure in seal monocyte *Il6* production was tested using a one-way ANOVA with repeated measures. Analyses were conducted in Prism 7 (GraphPad Software, Inc., La Jolla, CA, USA). All tests were two-tailed. Data are reported as means  $\pm$  s.d.

## RESULTS

### Reduced whole blood responses to *ex vivo* LPS exposure in seals

In both species of deep-diving seal (Weddell and northern elephant seals), the cytokine response of whole blood exposed to LPS *ex vivo* was lower compared with that of human blood exposed to LPS under the same conditions (Sidak *post hoc*  $P<0.0001$  for both seals versus human; Fig. 1A). Whereas IL6 protein content measured in human plasma increased  $>1000\times$  following LPS stimulation, it increased only 10 and  $100\times$  in plasma from Weddell and elephant seals, respectively. IL6 production between the two seal species did not differ significantly (Sidak *post hoc*  $P=0.9936$ ). IL6 production in Weddell and elephant seal blood was relatively consistent across all experimental LPS doses (with a plateau beyond 1 ng ml<sup>-1</sup> LPS) compared with that in humans, who demonstrate increasing IL6 production at each increase in LPS. Consistent with the scope of the IL6 response in the ELISA, Weddell seal IL6 levels measured by bead-based multiplex cytokine panel increased  $\sim 6\times$  from a baseline of  $2.5\pm 5.9$  pg ml<sup>-1</sup> plasma when blood was stimulated with 100 ng ml<sup>-1</sup> LPS (Fig. 1B). Of 13 cytokine and chemokines quantified by the multiplex assay, only five were above the detection limit in Weddell seal plasma (IL6, TNF $\alpha$ , IL10, IL18 and KC-like). Pro-inflammatory cytokines IL6 (Fig. 1B) and TNF $\alpha$ , as well as anti-inflammatory cytokine IL10, exhibited some degree of LPS dose-response, whereas IL18 and KC-like (keratinocyte chemoattractant) were detectable in all samples, but remained constant across levels of LPS exposure (Fig. 2).

### Isolated monocyte responses

In contrast to the limited ability of Weddell seal blood to generate IL6 protein upon *ex vivo* LPS exposure ( $\sim 10\times$  increase), mRNA expression of *Il6* increased robustly in isolated Weddell seal monocytes. Under standard cell culture conditions, *in vitro* LPS

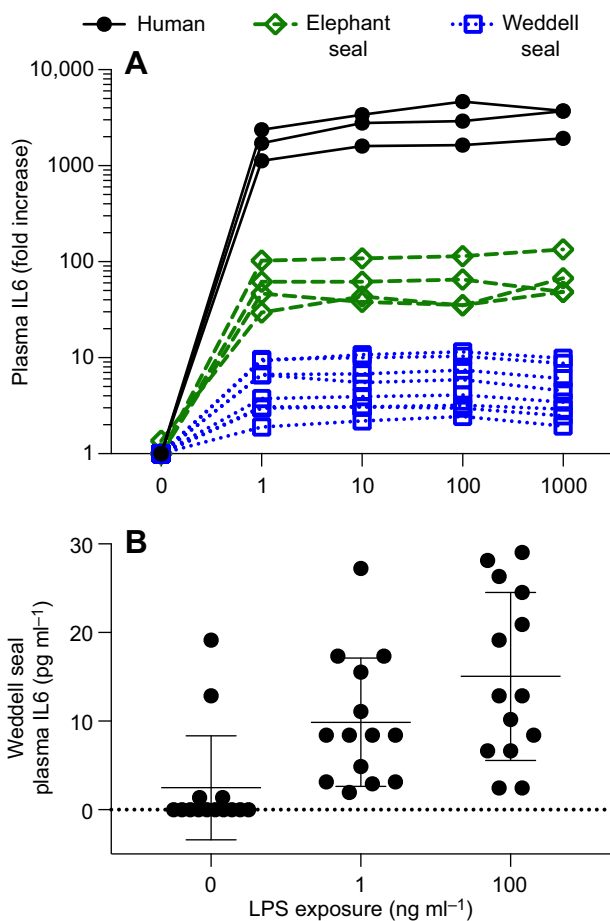

**Fig. 1. Interleukin-6 (IL6) production is reduced in the blood of deep-diving seals.** (A) IL6 protein production following a 4-h LPS *ex vivo* exposure in whole blood in three species ( $n=3$  humans,  $n=4$  elephant seals,  $n=8$  Weddell seals). Plasma IL6, measured by IL6 Quantikine ELISAs, was lower in the plasma of the two seals compared with humans (two-tailed Sidak *post hoc*  $P<0.0001$  for both seals). Weddell seals had the smallest relative increase in plasma IL6 of all species tested. (B) The low, ~6-fold response of plasma IL6 to 100 ng ml<sup>-1</sup> lipopolysaccharide (LPS) exposure in Weddell seals was confirmed using a bead-based multiplex cytokine panel ( $n=14$ ).

treatment dose-dependently increased *Il6* expression ( $>300\times$  at 1000 ng ml<sup>-1</sup> LPS; Fig. 3A). To tease apart the different cytokine responses between the two experiments (isolated cells versus a whole blood scenario), we exposed monocytes to LPS as before, but added back autologous seal serum to the cell culture medium. Replacement of FBS with autologous WSS conferred an anti-inflammatory benefit by decreasing *Il6* expression overall across the LPS dose-response curve ( $F_{1,6}=8.476$ ,  $P=0.027$ ; Fig. 3B). There was no significant interaction between LPS dose and experimental serum conditions in the two-way ANOVA ( $F_{4,24}=0.34$ ,  $P=0.85$ ), indicating that the response to LPS does not differ with dose level.

The supernatant of isolated monocytes in these experiments likewise displayed a globally reduced cytokine and chemokine production in WSS compared with FBS (Fig. 4). Of the seven chemokines/cytokines that were detected in monocyte culture medium (supernatant) by the multiplex panel (Fig. 4A), IL6 ( $F_{1,5}=13.77$ ,  $P=0.014$ ), IL8 ( $F_{1,5}=463.8$ ,  $P<0.0001$ ), IL10 ( $F_{1,5}=14.5$ ,  $P=0.013$ ), KC-like ( $F_{1,5}=18.18$ ,  $P=0.008$ ) and TNF $\alpha$  ( $F_{1,5}=7.369$ ,  $P=0.042$ ) were significantly lower after LPS exposure in WSS versus in FBS (Fig. 4B).

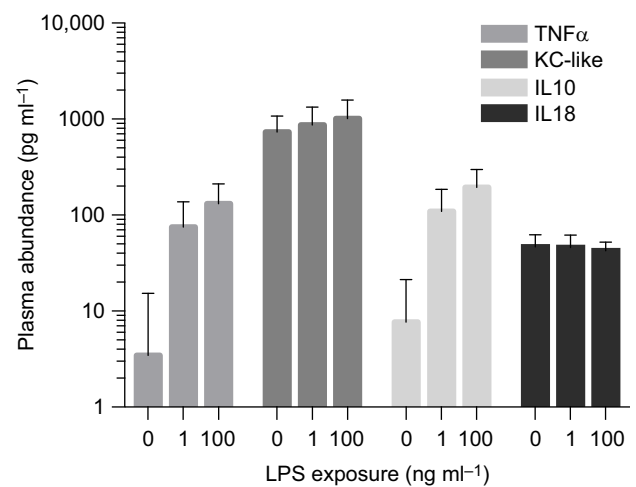

**Fig. 2. LPS-responsive cytokines are detected in Weddell seal plasma.** Four additional cytokines and chemokines were detected in Weddell seal plasma at baseline, and following a 4-h *ex vivo* exposure to LPS (1 and 100 ng ml<sup>-1</sup>,  $n=14$  for each condition). Only tumor necrosis factor- $\alpha$  (TNF $\alpha$ ) and interleukin-10 (IL10) increased with LPS. Data are summarized means $\pm$ s.d.

#### Mouse macrophage responses

We next tested whether seal serum confers anti-inflammatory protection from LPS exposure in other systems. mRNA expression of *Il6* ( $F_{1,2}=246.9$ ,  $P=0.004$ ), *Tnf $\alpha$*  ( $F_{1,2}=292.2$ ,  $P=0.003$ ), *Il1 $\beta$*  ( $F_{1,2}=130.2$ ,  $P=0.008$ ) and *Il10* ( $F_{1,2}=385.4$ ,  $P=0.003$ ) was lower in murine RAW cells exposed to LPS in the presence of WSS than in cells exposed to LPS in the presence of FBS (Fig. 5). Neither FBS nor WSS affected RAW cell viability (Fig. S1), suggesting that the lower inflammatory readout from cells cultured in WSS was not related to a difference in cell death.

#### Effect of high cortisol levels in seal serum

To test the possibility that naturally high circulating cortisol levels are responsible for the anti-inflammatory effects of seal serum, we exposed isolated seal monocytes to FBS medium supplemented with hydrocortisone prior to LPS exposure (constant 100 ng ml<sup>-1</sup> for each hydrocortisone treatment). There was no effect of hydrocortisone (10–10,000 ng ml<sup>-1</sup>) on LPS-induced *Il6* expression in seal monocytes (Fig. S2), suggesting that cortisol did not mediate or impact the effect of WSS.

#### Effect of high lipid levels in seal serum

Next, we considered the potential for lipid levels to influence LPS exposure, either as an organismal protective strategy or a technical artifact of LPS sequestration by native lipoproteins. We matched lipid contents in WSS and FBS, then repeated the LPS exposure in mouse monocytes. WSS consistently reduced *Il6* and *Il1 $\beta$*  expression in RAW cells stimulated with LPS. Delipidation did not impair the anti-inflammatory capacity of WSS (Fig. 6). Further, lipid supplementation did not enhance the anti-inflammatory ability of FBS (Fig. 6). Finally, we investigated an alternative *in vivo* hyperlipidemic model, by assaying LPS-induced IL6 protein production in whole blood of control versus obese LDLR knockout mice (20 weeks on a high-fat diet). In contrast to WSS and FBS experiments, where lipid supplementation (or depletion) had no effect, mice fed a high-fat diet had a pro-inflammatory response, with increased IL6 production compared with wild-type mice ( $F_{2,20}=14.45$ ,  $P=0.0001$ ; Fig. 7).

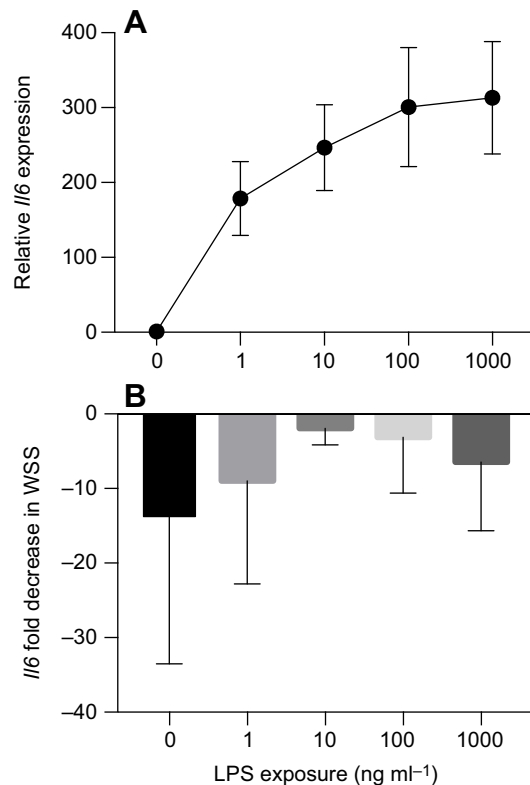

**Fig. 3. Weddell seal serum (WSS) reduced IL6 expression in isolated seal monocytes.** (A) LPS stimulation (1–1000 ng ml<sup>-1</sup> concentrations) robustly induced IL6 expression in isolated Weddell seal monocytes ( $n=12$  individuals, 3 replicate wells plated per individual) under standard cell culture conditions (DMEM supplemented with 10% FBS). (B) In response to the same LPS stimulation (in  $n=8$  additional animals, 3 replicate wells per individual per serum treatment), IL6 expression was relatively reduced in monocytes cultured with their own serum (WSS) versus commercially available fetal bovine serum (FBS; overall serum effect, two-tailed two-way ANOVA,  $F_{1,6}=8.476$ ;  $P=0.027$ , no significant interaction effect between serum type and LPS dose). Data are summarized means $\pm$ s.d.

## DISCUSSION

In this study, we demonstrated that seals have a lower *ex vivo* inflammatory response to LPS compared with humans, and that this difference may, in part, be explained by a serum-derived factor. This investigation took a unique, multi-species approach by combining *ex vivo* responses to inflammatory challenge with controlled, *in vitro* experiments in live cells to tease apart components of the response.

### Relevance of LPS stimulation and observed responses

LPS is an agonist of toll-like receptor 4 (TLR4). TLRs are a type of pattern recognition receptor (PRR) that help recognize molecules broadly shared by pathogens but different from host molecules. These receptors are an important part of the innate immune system that has evolved to provide rapid recognition of and protection from both pathogens and endogenous pro-inflammatory molecules released by cell damage (Okin and Medzhitov, 2012). Upon binding of LPS and TLR4 activation, a series of downstream cell signaling events occur, which includes the production of cytokines, notably IL6, which promotes fever and synthesis of acute phase proteins. We chose to focus on IL6 as it is a rapid, sensitive marker of acute inflammation, and has been used in large human clinical trials as a surrogate for the inflammatory response to critical illness (Brower et al., 2000), but has also been shown to play a critical

role in lung inflammation/injury in mice upon exposure to environmental air pollutants (Yu et al., 2002). LPS is also known to promote the secretion of other pro-inflammatory cytokines, including IL1 $\beta$  and TNF $\alpha$  from human PBMCs (Eggesbø et al., 1994), and TNF $\alpha$ , IL8 and KC-like from canine and pinniped PBMCs (Levin et al., 2014). TNF $\alpha$  is potent chemoattractant for neutrophils and also stimulates the acute phase response. IL8 is also a neutrophil chemotactic factor. IL1 $\beta$  has fever-producing effects and contributes to the pain associated with inflammation. Importantly, TNF $\alpha$  and IL1 $\beta$  help regulate the development of lung IR injury (Krishnadasan et al., 2003). In addition, LPS has also been shown to promote the secretion of the anti-inflammatory cytokine IL10 (Chanteux et al., 2007), which helps to downregulate the expression of cytokines produced by T helper 1 cells and may help protect against lung injury, in part by inhibiting TNF $\alpha$  and IL1 $\beta$  (Shanley et al., 2000). A variety of interleukins (including IL6) have been explored to evaluate the health and disease status of stranded marine mammals, as well as resolution of the immune response during rehabilitation (reviewed by Levin, 2018).

### The diving seal model system

There are many physiological features of diving seals that likely contribute to a pro-inflammatory milieu. The unique ecological niche exploited by deep divers exposes them to stressors that would adversely affect terrestrial mammals. In addition to repeated episodes of lung collapse and re-expansion owing to high hydrostatic pressure, the tissues of diving seals experience profound hypoxia and IR events resulting from breath-hold exercise, which could produce significant injury in a non-adapted system. Seals also have consistently high blood cholesterol levels, and transiently high triglycerides associated with phases of nursing, weaning and adult foraging (Sakamoto et al., 2009; Schumacher et al., 1992). Degree of adiposity has been positively linked to circulating cytokine levels in elephant seals (Peck et al., 2016). Yet, there is no evidence that seals suffer from atherosclerosis or vascular disease, despite being hypercholesterolemic by human standards. Indeed, seals have been proposed as models for investigating naturally occurring protection against issues stemming from IR and diet-induced obesity, namely oxidative stress (Zenteno-Savín et al., 2002) and metabolic syndrome (Houser et al., 2013). Teleologically, therefore, it would not be surprising that diving mammals have evolved multiple strategies to mitigate organ damage from the above stresses. While changes in surfactant function and the structure of distal airways are likely adaptations for diving in marine mammals (Foot et al., 2006), our data suggest that a modified innate immune response is another.

The innate immune response is initiated rapidly by resident populations of white blood cells, producing non-targeted effects such as acute inflammation mediated by cytokines. This arm of the immune system is expected to be the most responsive under hypoxic conditions that mimic the low oxygen tension environments of wounds. Although hypoxia limits adaptive immune cell functionality, it directly promotes innate immune cell recruitment and activation (Sica et al., 2011). Consequently, anti-inflammatory effects that target this immune arm may be most relevant in protection against dive-induced tissue injury.

Although this experiment applied LPS/endotoxin *ex vivo* and *in vitro* to stimulate and study immune responses under controlled conditions, LPS exposure may also be biologically relevant for Antarctic seals. Proteobacteria, the dominant phylum of gram-negative bacteria in which LPS occurs, represent the major component of skin microbiome (A.G.H., K.N.A., L.A.H., D.P.C. and E.S.B., unpublished observations), and gram-negative rods have been cultured from skin swabs in Weddell seals (Mellish

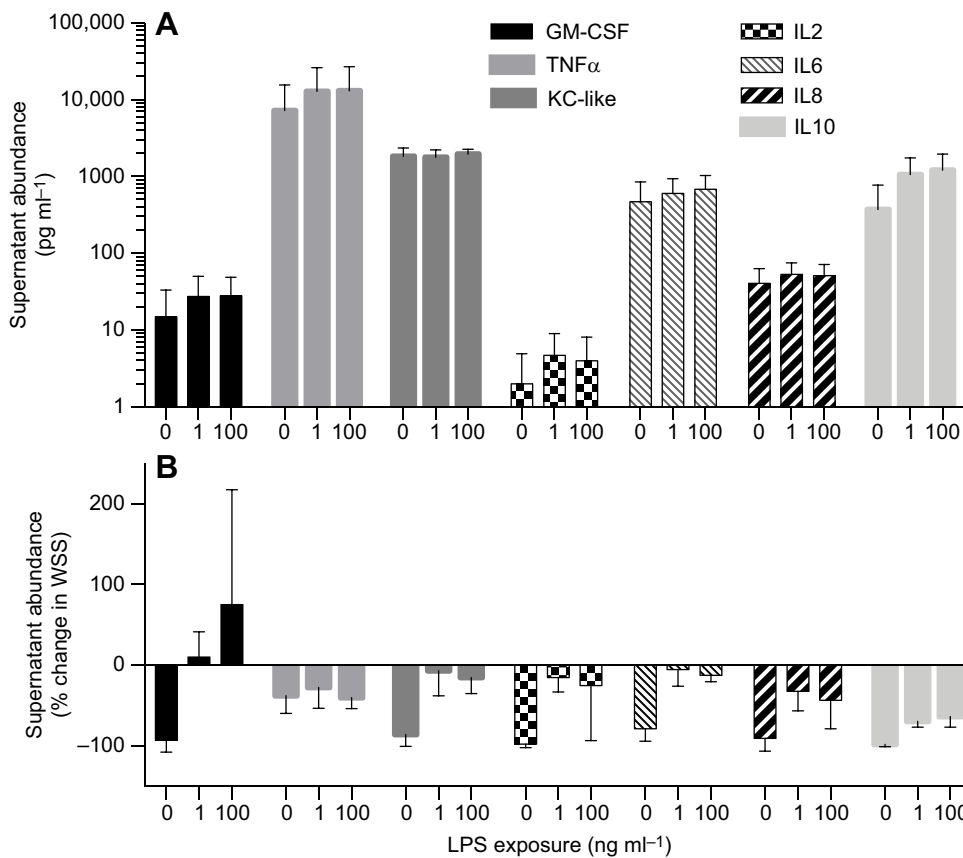

**Fig. 4. Weddell seal serum (WSS) reduces overall inflammatory response of seal monocytes.** (A) Seven cytokines and chemokines are detected in cell culture media from control and LPS-stimulated (1 or 100 ng ml<sup>-1</sup>) Weddell seal monocytes ( $n=6$  biological replicates, exposed to each dose and serum condition). (B) Production of IL6 (two-tailed two-way ANOVA,  $F_{1,5}=13.77$ ,  $P=0.014$ ), IL8 ( $F_{1,5}=463.8$ ,  $P<0.0001$ ), IL10 ( $F_{1,5}=14.5$ ,  $P=0.013$ ), KC-like ( $F_{1,5}=18.18$ ,  $P=0.008$ ) and TNF $\alpha$  ( $F_{1,5}=7.369$ ,  $P=0.042$ ) by monocytes is significantly reduced during LPS exposure in cells cultured with WSS compared with FBS.

et al., 2010), indicating their presence even in polar ecosystems. Proteobacteria have also previously been identified in the fecal microbiome (12.9% relative abundance) of this species (Banks et al., 2014), suggesting that gram-negative bacteria are an important part of their gut microbial community. A healthy gut barrier prevents the translocation of live bacteria into the tissues and circulation, a process that, if defective, would expose animals to acute infectious and inflammatory challenge, and could produce

sepsis (Balzan et al., 2007; Schuijt et al., 2013). The integrity of the gut barrier faces constant challenge from hypoxia–reoxygenation across foraging bouts. Diving seals demonstrate regional differences in organ perfusion (Zapol et al., 1979), with visceral tissues of Weddell seals thought to remain consistently vasoconstricted during long submergence (Davis et al., 1983; Guppy et al., 1986), and experimental evidence in another pinniped predicts that digestion is at least partially deferred to

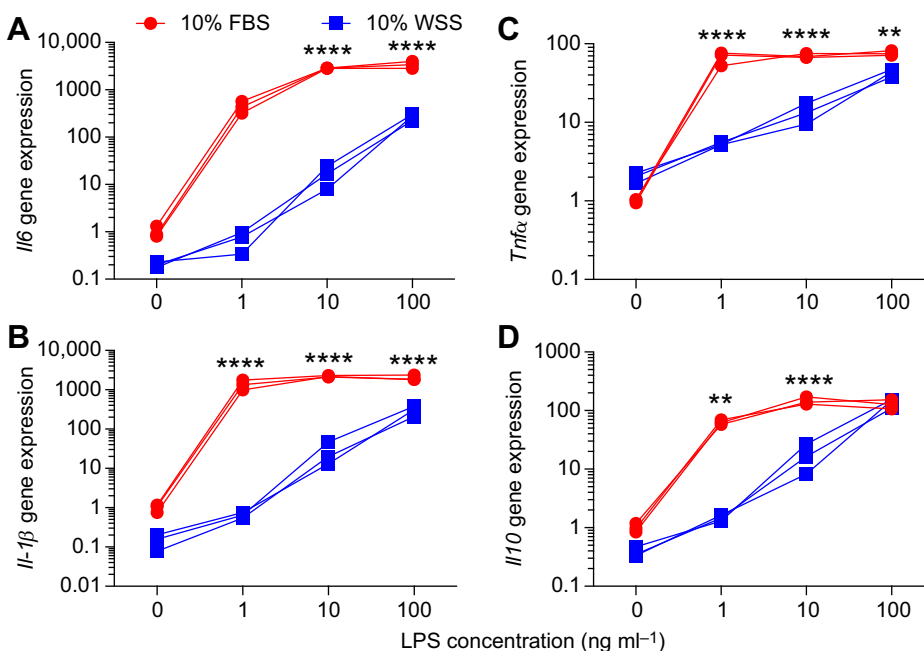

**Fig. 5. A mouse macrophage cell line (RAW 264.7) is protected from LPS-induced inflammatory responses by Weddell seal serum (WSS).** mRNA expression of (A) *Il6*, (B) *Il-1 $\beta$* , (C) *Tnf $\alpha$*  and (D) *Il10* in mouse macrophages cultured in DMEM with 10% fetal bovine serum (FBS, red) or 10% WSS (blue) was quantified after stimulation with LPS (1–100 ng ml<sup>-1</sup>,  $n=3$  wells per condition, error bars represent means $\pm$ s.d.). Target gene expression was normalized to *18s* as a reference gene, and expression levels are presented relative to the FBS condition in all panels. Asterisks denote significant differences between FBS and WSS at each LPS dose by two-tailed Sidak *post hoc* tests corrected for multiple comparisons (\*\* $P<0.01$ , \*\*\*\* $P<0.0001$ ).

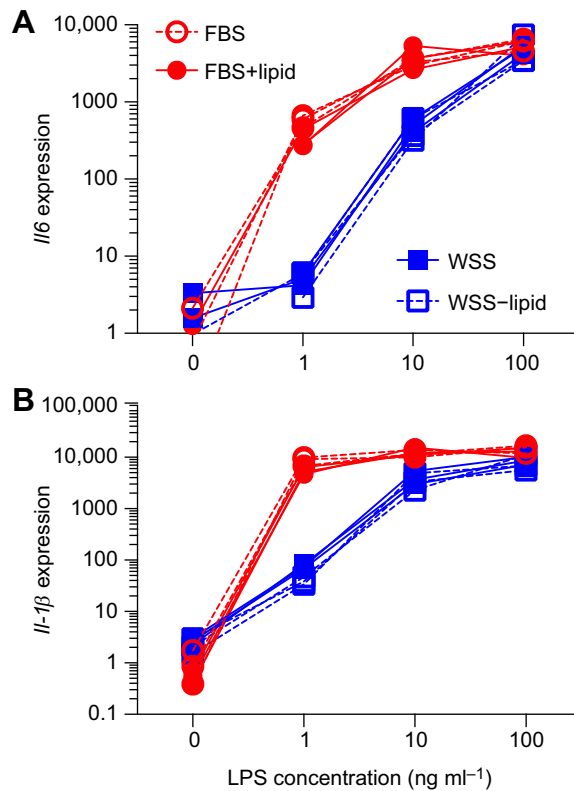

**Fig. 6. Lipid content of serum does not affect LPS-induced cytokine responses of mouse macrophages.** Expression of (A) *Il6* and (B) *Il-1β* was measured in cells exposed to LPS (1–100 ng ml<sup>-1</sup>,  $n=3$  wells per condition, error bars represent means $\pm$ s.d.). Culture medium was provided in four conditions: either 10% FBS or 10% WSS, each  $\pm$ lipid. mRNA expression of target genes is normalized to *18s* as a reference, and expression levels are presented relative to the FBS condition in both panels. Cytokine expression is significantly affected by LPS dose, serum condition, and the between-factors interaction; however, no *post hoc* tests comparing FBS $\pm$ lipid or WSS $\pm$ lipid reached significance in any condition.

the surface period (Rosen et al., 2015). In addition to their increased risk of bacterial translocation and exposure to bacterial endotoxin, endogenous ligands of TLR4 (e.g. HSP70, HMGB1

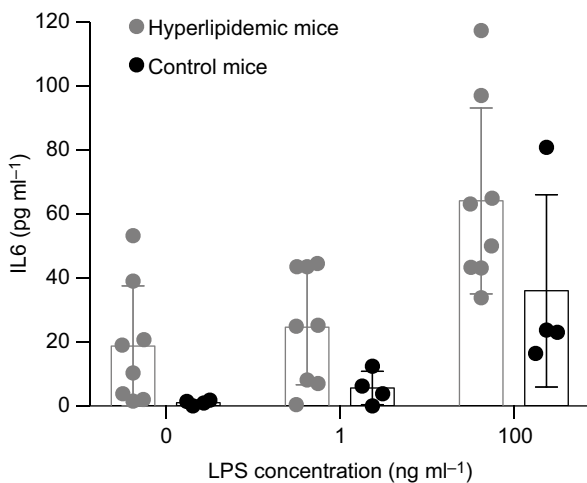

**Fig. 7. IL6 production is generally elevated in hyperlipidemic mice.** Whole blood of control mice ( $n=4$ ) had significantly reduced IL6 production across all conditions (two-way ANOVA,  $F_{2,20}=14.45$ ,  $P=0.0001$ ) when exposed to LPS (1 or 100 ng ml<sup>-1</sup>), compared with mice fed a high-fat diet ( $n=8$ ).

proteins) may also be released in response to IR (Kaczorowski et al., 2009). Consequently, studying the response to a TLR4 ligand in seals is likely to have pathophysiological relevance.

#### Evidence for a serum-derived protective factor

Our data suggest that a seal serum-based factor mediates the cytokine response to LPS stimulation, although we cannot completely rule out a species-specific difference in immune cell responses as well. The importance of seal serum in blunting the inflammatory response of seal monocytes was clear. *Il6* expression and induction of cytokines from isolated cells was attenuated in the presence of WSS compared with FBS. Although isolated seal monocytes responded to LPS with a clear increase in *Il6* mRNA production ( $\sim 300\times$  under standard culture conditions), it is noteworthy that the magnitude of this response was muted in comparison to similar studies in isolated human monocytes by our group (Hoeft et al., 2017). A previous study examining LPS-induced cytokine production in isolated PBMCs also suggests that harbor seals (*Phoca vitulina*), gray seals (*Halichoerus grypus*) and harp seals (*Pagophilus groenlandicus*) have slightly reduced cell level inflammatory responses compared with dogs (*Canis familiaris*) under similar culture conditions, although between-species comparisons were not explicitly made (Levin et al., 2014). Despite some methodological differences between studies prohibiting quantitative comparisons of LPS responses, it generally appears that magnitude of change in pro-inflammatory cytokines/chemokines are lowest in deep-diving Weddell seals among these five carnivores. It is possible that diving mammals, including Weddell seals, additionally have immune cell-level adaptations that reduce the effects of dive-related challenges. For example, both elephant seal platelets and beluga (*Delphinapterus leucas*) immune cells respond differently from human cells to increased hydrostatic pressure (Field and Tablin, 2012; Thompson and Romano, 2015, 2016), and their responses to inflammation may also differ. However, the human monocyte response to acute LPS stimulation is on average  $\sim 10\times$  stronger than the seal response (Hoeft et al., 2017), whereas the response in whole blood is markedly increased ( $>100\times$  higher in human versus seal). A more pronounced difference between species response *in vitro* versus *ex vivo* supports the idea that seal serum, and not a difference in properties of immune cells themselves, is the primary anti-inflammatory factor.

We identified and tested two elements of seal serum that are expected to differ between species, and which may provide an anti-inflammatory benefit. Weddell seals demonstrate extremely rapid cortisol turnover rates and high total cortisol levels (Barrell and Montgomery, 1989; Bartsh et al., 1992; Constable et al., 2006; Shero et al., 2015), traits suggested to relate to protection from high-pressure nervous syndrome (Liggins et al., 1979, 1993). Steroids have been shown to have an anti-inflammatory effect by multiple mechanisms, including inhibition of NF- $\kappa$ B (Ray and Prefontaine, 1994; Van Der Burg et al., 1997) and inhibition of cytokine gene expression (Vanden Berghe et al., 2000). High-dose steroids are commonly used as anti-inflammatory agents in human (Hench et al., 1950) and veterinary medicine (Pedersen et al., 1976). It is therefore possible that high circulating cortisol levels may have an anti-inflammatory effect in seal serum. However, we found no evidence that hydrocortisone pre-treatment (at biologically relevant levels for Weddell seals) was immunosuppressive in monocytes. This concurs with observations from fasting elephant seals (females during molting and breeding) that report no link between circulating cortisol and IL6 levels (Peck et al., 2016). We also considered that the known hyperlipidemic baseline in seals may interfere with inflammatory responses. For instance, both northern elephant seals

(Tift et al., 2011) and Weddell seals (Schumacher et al., 1992) have high levels of high-density lipoprotein (HDL) and HDL cholesterol relative to humans. There is evidence that HDL binds to and sequesters LPS, preventing effective experimental stimulation of immune cells (De Nardo et al., 2014). However, the facts that delipidating seal serum did not change the anti-inflammatory effect of WSS on RAW cells, that LPS responses in WSS-treated RAW cells approaches the levels in FBS-treated cells at a moderately high dose of LPS (100 ng ml<sup>-1</sup>), and that both Weddell seals and elephant seals have a measurable *ex vivo* response to a low dose of LPS (1 ng ml<sup>-1</sup>) argue against an effect mediated purely by LPS sequestration.

Our findings raise several intriguing questions that will require further exploration. LPS requires the presence of other cofactors, including CD14, MD2 and lipopolysaccharide binding protein (LBP), for optimal function (Lee et al., 2012). It is possible that one or more of these protein cofactors is reduced in seals. Although we have primarily focused on the TLR4 ligand LPS, it would be informative to examine the effect of other TLR ligands to determine whether there is a general attenuation of the inflammatory response across multiple ligands. The response to endogenous TLR ligands such as HMGB-1 (an endogenous TLR4 ligand) would be especially interesting to study because TLR4 is implicated in the pathogenesis of IR injury in many organs (Yang et al., 2017; Zhao et al., 2014).

## Conclusions

The results presented here reveal a significantly attenuated inflammatory response to the TLR4 ligand LPS in seal blood compared with human blood, and support our hypothesis that deep-diving seals respond to acute inflammatory stimuli differently from humans. The data suggest the presence of a serum-borne factor that blunts the inflammatory response to LPS in these deep divers. Although high cortisol and lipid levels do not appear to account for this relative anti-inflammatory effect, serum proteins may be an attractive target for further investigation. There is evidence that modulation of inflammation by serum proteins may be responsible for the markedly different response to inflammation in mice compared with humans (Lin et al., 2015). Uncovering the identity of the factor(s) may help us understand more about seal biology and potentially have translational implications for reducing the sequelae of IR, particularly in the context of acute lung injury and solid organ transplants.

## Acknowledgements

Mouse blood samples were kindly provided by R. Malhotra and D. Bloch. We gratefully acknowledge the logistical support provided by the Antarctic Support Contractor at McMurdo Station.

## Competing interests

The authors declare no competing or financial interests.

## Author contributions

Conceptualization: A.B., M.L., M.L.F., A.G.H.; Methodology: A.B., M.L., M.L.F., A.G.H.; Validation: A.B., A.J.B., M.L.; Formal analysis: A.B., A.J.B., M.L., A.G.H.; Investigation: A.B., A.J.B., M.L., K.N.A., M.L.F., L.A.H., E.S.B., A.G.H.; Resources: A.B., M.L., D.P.C., E.S.B., A.G.H.; Writing - original draft: A.B., M.L., A.G.H.; Writing - review & editing: A.B., A.J.B., M.L., K.N.A., M.L.F., L.A.H., D.P.C., E.S.B., A.G.H.; Supervision: A.G.H.; Project administration: E.S.B., A.H.; Funding acquisition: D.P.C., E.S.B., A.G.H.

## Funding

This study was supported by a National Science Foundation grant (1443554 to A.G.H., E.S.B. and D.P.C.).

## Supplementary information

Supplementary information available online at <http://jeb.biologists.org/lookup/doi/10.1242/jeb.178491.supplemental>

## References

- Balzan, S., de Almeida Quadros, C., De Cleve, R., Zilberstein, B. and Ceconello, I. (2007). Bacterial translocation: overview of mechanisms and clinical impact. *J. Gastroenterol. Hepatol.* **22**, 464-471.
- Banks, J. C., Cary, S. C. and Hogg, I. D. (2014). Isolated faecal bacterial communities found for Weddell seals, *Leptonychotes weddellii*, at White Island, McMurdo Sound, Antarctica. *Polar Biol.* **37**, 1857-1864.
- Barrell, G. K. and Montgomery, G. W. (1989). Absence of circadian patterns of secretion of melatonin or cortisol in Weddell seals under continuous natural daylight. *J. Endocrinol.* **122**, 445-449.
- Bartsh, S. S., Johnston, S. D. and Siniff, D. B. (1992). Territorial behavior and breeding frequency of male Weddell seals (*Leptonychotes weddellii*) in relation to age, size, and concentrations of serum testosterone and cortisol. *Can. J. Zool.* **70**, 680-692.
- Bigley, N. J., Perymon, H., Bowman, G. C., Hull, B. E., Stills, H. F., Jr. and Henderson, R. A. (2008). Inflammatory cytokines and cell adhesion molecules in a rat model of decompression sickness. *J. Interferon Cytokine Res.* **28**, 55-63.
- Brower, R., Matthay, M., Morris, A., Schoenfeld, D., Thompson, B. T. and Wheeler, A. (2000). The Acute Respiratory Distress Syndrome Network. Ventilation with lower tidal volumes as compared with traditional tidal volumes for acute lung injury and the acute respiratory distress syndrome. *N. Engl. J. Med.* **342**, 1301-1308.
- Butler, P. J. and Jones, D. R. (1997). Physiology of diving of birds and mammals. *Physiol. Rev.* **77**, 837-899.
- Chanteux, H., Guisset, A. C., Pilette, C. and Sibille, Y. (2007). LPS induces IL-10 production by human alveolar macrophages via MAPKs- and Sp1-dependent mechanisms. *Respir. Res.* **8**, 71.
- Cheng, Y.-J., Chan, K.-C., Chien, C.-T., Sun, W.-Z. and Lin, C.-J. (2006). Oxidative stress during 1-lung ventilation. *J. Thorac. Cardiovasc. Surg.* **132**, 513-518.
- Constable, S., Parslow, A., Dutton, G., Rogers, T. and Hogg, C. (2006). Urinary cortisol sampling: a non-invasive technique for examining cortisol concentrations in the Weddell seal, *Leptonychotes weddellii*. *Zoo Biol.* **25**, 137-144.
- Costa, D. P. and Sinervo, B. (2004). Field physiology: physiological insights from animals in nature. *Annu. Rev. Physiol.* **66**, 209-238.
- Davis, R. W., Castellini, M. A., Kooyman, G. L. and Maue, R. (1983). Renal glomerular filtration rate and hepatic blood flow during voluntary diving in Weddell seals. *Am. J. Physiol. Regul. Integr. Comp. Physiol.* **245**, R743-R748.
- De Miranda, M. A., Jr, Schlater, A. E., Green, T. L. and Kanatous, S. B. (2012). In the face of hypoxia: myoglobin increases in response to hypoxic conditions and lipid supplementation in cultured Weddell seal skeletal muscle cells. *J. Exp. Biol.* **215**, 806-813.
- De Nardo, D., Labzin, L. I., Kono, H., Seki, R., Schmidt, S. V., Beyer, M., Xu, D., Zimmer, S., Lahrmann, C., Schildberg, F. A. et al. (2014). High-density lipoprotein mediates anti-inflammatory reprogramming of macrophages via the transcriptional regulator ATF3. *Nat. Immunol.* **15**, 152-160.
- Eggesbø, J. B., Hjermann, I., Lund, P. K., Joø, G. B., Øvstebø, R. Kierulf, P. (1994). LPS-induced release of IL-1 $\beta$ , IL-6, IL-8, TNF- $\alpha$  and sCD14 in whole blood and PBMC from persons with high or low levels of HDL-lipoprotein. *Cytokine* **6**, 521-529.
- Ersso, A., Linder, C., Ohlsson, K. and Ekholm, A. (1998). Cytokine response after acute hyperbaric exposure in the rat. *Undersea Hyper. Med.* **25**, 217-221.
- Falke, K. J., Hill, R. D., Qvist, J., Schneider, R. C., Guppy, M., Liggins, G. C., Hochachka, P. W., Elliott, R. E. and Zapol, W. M. (1985). Seal lungs collapse during free diving: evidence from arterial nitrogen tensions. *Science* **229**, 556-559.
- Field, C. L. and Tablin, F. (2012). Response of northern elephant seal platelets to pressure and temperature changes: a comparison with human platelets. *Comp. Biochem. Physiol. A Mol. Integr. Physiol.* **162**, 289-295.
- Foot, N. J., Orgeig, S. and Daniels, C. B. (2006). The evolution of a physiological system: the pulmonary surfactant system in diving mammals. *Respir. Physiol. Neurobiol.* **154**, 118-138.
- Fu, Q., Bovenkamp, D. E. and Van Eyk, J. E. (2007). A rapid, economical, and reproducible method for human serum delipidation and albumin and IgG removal for proteomic analysis. In *Cardiovascular Proteomics: Methods and Protocols* (ed. F. Vivanco), pp. 365-371. Totowa, NJ: Humana Press.
- Guppy, M., Hill, R. D., Schneider, R. C., Qvist, J., Liggins, G. C., Zapol, W. M. and Hochachka, P. W. (1986). Microcomputer-assisted metabolic studies of voluntary diving of Weddell seals. *Am. J. Physiol.* **250**, R175-R187.
- Gutierrez, D. B., Fahman, A., Gardner, M., Kleinhenz, D., Piscitelli, M., Raverty, S., Haulena, M. and Zimba, P. V. (2015). Phosphatidylcholine composition of pulmonary surfactant from terrestrial and marine diving mammals. *Respir. Physiol. Neurobiol.* **211**, 29-36.
- Hench, P. S., Kendall, E. C., Slocumb, C. H. and Polley, H. F. (1950). Effects of cortisone acetate and pituitary ACTH on rheumatoid arthritis, rheumatic fever and certain other conditions: a study in clinical physiology. *Arch. Intern. Med.* **85**, 545-666.
- Hoefl, K., Bloch, D. B., Graw, J. A., Malhotra, R., Ichinose, F. and Bagchi, A. (2017). Iron loading exaggerates the inflammatory response to the toll-like receptor 4 ligand lipopolysaccharide by altering mitochondrial homeostasis. *Anesthesiology* **127**, 121-135.



- Hooker, S. K., Fahlman, A., Moore, M. J., De Soto, N. A., De Quiros, Y. B., Brubakk, A. O., Costa, D. P., Costidis, A. M., Dennison, S., Falke, K. J. et al. (2012). Deadly diving? Physiological and behavioural management of decompression stress in diving mammals. *Proc. R. Soc. B* **279**, 1041-1050.
- Houser, D., Champagne, C. and Crocker, D. (2013). A non-traditional model of the metabolic syndrome: the adaptive significance of insulin resistance in fasting-adapted seals. *Front. Endocrinol.* **4**, 164.
- Hückstädt, L. A., Koch, P. L., McDonald, B. I., Goebel, M. E., Crocker, D. E. and Costa, D. P. (2012). Stable isotope analyses reveal individual variability in the trophic ecology of a top marine predator, the southern elephant seal. *Oecologia* **169**, 395-406.
- Kaczorowski, D. J., Tsung, A. and Billiar, T. R. (2009). Innate immune mechanisms in ischemia/reperfusion. *Front. Biosci.* **1**, 91-98.
- Khuduyakov, J. I., Champagne, C. D., Meneghetti, L. M. and Crocker, D. E. (2017). Blubber transcriptome response to acute stress axis activation involves transient changes in adipogenesis and lipolysis in a fasting-adapted marine mammal. *Sci. Rep.* **7**, 42110.
- Kooyman, G. L. and Ponganis, P. J. (1998). The physiological basis of diving to depth: birds and mammals. *Annu. Rev. Physiol.* **60**, 19-32.
- Kooyman, G. L., Kerem, D. H., Campbell, W. B. and Wright, J. J. (1971). Pulmonary function in freely diving Weddell seals, *Leptonychotes weddelli*. *Respir. Physiol.* **12**, 271-282.
- Kooyman, G. L., Castellini, M. A. and Davis, R. W. (1981). Physiology of diving in marine mammals. *Annu. Rev. Physiol.* **43**, 343-356.
- Krishnadasan, B., Naidu, B. V., Byrne, K., Fraga, C., Verrier, E. D. and Mulligan, M. S. (2003). The role of proinflammatory cytokines in lung ischemia-reperfusion injury. *J. Thorac. Cardiovasc. Surg.* **125**, 261-272.
- Lee, C. C., Avalos, A. M. and Ploegh, H. L. (2012). Accessory molecules for Toll-like receptors and their function. *Nat. Rev. Immunol.* **12**, 168.
- Leite, C. F., Calixto, M. C., Toro, I. F. C., Antunes, E. and Mussi, R. K. (2012). Characterization of pulmonary and systemic inflammatory responses produced by lung re-expansion after one-lung ventilation. *J. Cardiothorac. Vasc. Anesth.* **26**, 427-432.
- Levin, M. (2018). Marine mammal immunology. In *CRC Handbook of Marine Mammal Medicine* (ed. F. M. D. Gulland, L. A. Dierauf and K. L. Whitman). Boca Raton, FL: CRC Press.
- Levin, M., Romano, T., Matassa, K. and De Guise, S. (2014). Validation of a commercial canine assay kit to measure pinniped cytokines. *Vet. Immunol. Immunopathol.* **160**, 90-96.
- Liggins, G. C., France, J. T., Knox, B. S. and Zapol, W. M. (1979). High corticosteroid levels in plasma of adult and foetal Weddell seals (*Leptonychotes weddelli*). *Acta Endocrinol.* **90**, 718-726.
- Liggins, G. C., France, J. T., Schneider, R. C., Knox, B. S. and Zapol, W. M. (1993). Concentrations, metabolic clearance rates, production rates and plasma binding of cortisol in Antarctic phocid seals. *Acta Endocrinol.* **129**, 356-359.
- Lin, T., Maita, D., Thundivalappil, S. R., Riley, F. E., Hamsch, J., Van Marter, L. J., Christou, H. A., Berra, L., Fagan, S., Christiani, D. C. et al. (2015). Hemopexin in severe inflammation and infection: mouse models and human diseases. *Crit. Care* **19**, 166.
- Lohser, J. and Slinger, P. (2015). Lung injury after one-lung ventilation: a review of the pathophysiologic mechanisms affecting the ventilated and the collapsed lung. *Anesth. Analg.* **121**, 302-318.
- McDonald, B. I. and Ponganis, P. J. (2012). Lung collapse in the diving sea lion: hold the nitrogen and save the oxygen. *Biol. Lett.* **8**, 1047-1049.
- McDonald, B. I. and Ponganis, P. J. (2013). Insights from venous oxygen profiles: oxygen utilization and management in diving California sea lions. *J. Exp. Biol.* **216**, 3332-3341.
- Meir, J. U., Champagne, C. D., Costa, D. P., Williams, C. L. and Ponganis, P. J. (2009). Extreme hypoxic tolerance and blood oxygen depletion in diving elephant seals. *Am. J. Physiol. Regul. Integr. Comp. Physiol.* **297**, R927-R939.
- Mellish, J., Tuomi, P., Hindle, A., Jang, S. and Horning, M. (2010). Skin microbial flora and effectiveness of aseptic technique for deep muscle biopsies in Weddell seals (*Leptonychotes weddelli*) in McMurdo Sound, Antarctica. *J. Wildl. Dis.* **46**, 655-658.
- Mellish, J.-A. E., Hindle, A. G. and Horning, M. (2011). Health and condition in the adult Weddell seal of McMurdo Sound, Antarctica. *Zoology* **114**, 177-183.
- Miller, N. J., Daniels, C. B., Schürch, S., Schoel, W. M. and Orgeig, S. (2006a). The surface activity of pulmonary surfactant from diving mammals. *Respir. Physiol. Neurobiol.* **150**, 220-232.
- Miller, N. J., Postle, A. D., Orgeig, S., Koster, G. and Daniels, C. B. (2006b). The composition of pulmonary surfactant from diving mammals. *Respir. Physiol. Neurobiol.* **152**, 152-168.
- Okin, D. and Medzhitov, R. (2012). Evolution of inflammatory diseases. *Curr. Biol.* **22**, R733-R740.
- Peck, H. E., Costa, D. P. and Crocker, D. E. (2016). Body reserves influence allocation to immune responses in capital breeding female northern elephant seals. *Funct. Ecol.* **30**, 389-397.
- Pedersen, N. C., Castles, J. and Weisner, K. (1976). Noninfectious canine arthritis: rheumatoid arthritis. *J. Am. Vet. Med. Assoc.* **169**, 295-303.
- Ponganis, P. J., Meir, J. U. and Williams, C. L. (2011). In pursuit of Irving and Scholander: a review of oxygen store management in seals and penguins. *J. Exp. Biol.* **214**, 3325-3339.
- Ray, A. and Prefontaine, K. E. (1994). Physical association and functional antagonism between the p65 subunit of transcription factor NF-kappa B and the glucocorticoid receptor. *Proc. Natl Acad. Sci. USA* **91**, 752-756.
- Ridgway, S. H. and Howard, R. (1979). Dolphin lung collapse and intramuscular circulation during free diving: evidence from nitrogen washout. *Science* **206**, 1182-1183.
- Rosen, D. A. S., Gerlinsky, C. D. and Trites, A. W. (2015). Evidence of partial deferment of digestion during diving in Steller sea lions (*Eumetopias jubatus*). *J. Exp. Mar. Biol. Ecol.* **469**, 93-97.
- Rosenfeld, Y. and Shai, Y. (2006). Lipopolysaccharide (Endotoxin)-host defense antibacterial peptides interactions: role in bacterial resistance and prevention of sepsis. *Biochim. Biophys. Acta Biomembr.* **1758**, 1513-1522.
- Sakamoto, K. Q., Sato, K., Naito, Y., Habara, Y., Ishizuka, M. and Fujita, S. (2009). Morphological features and blood parameters of Weddell seal (*Leptonychotes weddelli*) mothers and pups during the breeding season. *J. Vet. Med. Sci.* **71**, 341-344.
- Schuijt, T. J., van der Poll, T., de Vos, W. M. and Wiersinga, W. J. (2013). The intestinal microbiota and host immune interactions in the critically ill. *Trends Microbiol.* **21**, 221-229.
- Schumacher, U., Rauh, G., Piötzt, J. and Welsch, U. (1992). Basic biochemical data on blood from Antarctic Weddell seals (*Leptonychotes weddelli*): ions, lipids, enzymes, serum proteins and thyroid hormones. *Comp. Biochem. Physiol. A Physiol.* **102**, 449-451.
- Shanley, T. P., Vasi, N. and Denenberg, A. (2000). Regulation of chemokine expression by IL-10 in lung inflammation. *Cytokine* **12**, 1054-1064.
- Shero, M. R., Krotz, R. T., Costa, D. P., Avery, J. P. and Burns, J. M. (2015). How do overwinter changes in body condition and hormone profiles influence Weddell seal reproductive success? *Funct. Ecol.* **29**, 1278-1291.
- Sica, A., Melillo, G. and Varesio, L. (2011). Hypoxia: a double-edged sword of immunity. *J. Mol. Med.* **89**, 657-665.
- Spragg, R. G., Ponganis, P. J., Marsh, J. J., Rau, G. A. and Bernhard, W. (2004). Surfactant from diving aquatic mammals. *J. Appl. Physiol.* **96**, 1626-1632.
- Suzuki, S., Tanita, T., Koike, K. and Fujimura, S. (1992). Evidence of acute inflammatory response in reexpansion pulmonary edema. *Chest* **101**, 275-276.
- Thompson, L. A. and Romano, T. A. (2015). Beluga (*Delphinapterus leucas*) granulocytes and monocytes display variable responses to in vitro pressure exposures. *Front. Physiol.* **6**, 128.
- Thompson, L. A. and Romano, T. A. (2016). Pressure induced changes in adaptive immune function in belugas (*Delphinapterus leucas*); implications for dive physiology and health. *Front. Physiol.* **7**, 442.
- Tift, M. S., Houser, D. S. and Crocker, D. E. (2011). High-density lipoprotein remains elevated despite reductions in total cholesterol in fasting adult male elephant seals (*Miirounga angustirostris*). *Comp. Biochem. Physiol. B Biochem. Mol. Biol.* **159**, 214-219.
- Van Der Burg, B., Liden, J., Okret, S., Delaunay, F., Wissink, S., Van Der Saag, P. T. and Gustafsson, J.-Å. (1997). Nuclear factor- $\kappa$  B repression in antiinflammation and immunosuppression by glucocorticoids. *Trends Endocrinol. Metab.* **8**, 152-157.
- Vanden Berghe, W., Vermeulen, L., De Wilde, G., De Bosscher, K., Boone, E. and Haegeman, G. (2000). Signal transduction by tumor necrosis factor and gene regulation of the inflammatory cytokine interleukin-6. *Biochem. Pharmacol.* **60**, 1185-1195.
- Wang, H.-T., Fang, Y.-Q., Bao, X.-C., Yuan, H.-R., Ma, J., Wang, F.-F., Zhang, S. and Li, K.-C. (2015). Expression changes of TNF- $\alpha$ , IL-1 $\beta$  and IL-6 in the rat lung of decompression sickness induced by fast buoyancy ascent escape. *Undersea Hyperbaric Med.* **42**, 23-31.
- Warren, H. S., Fitting, C., Hoff, E., Adib-Conquy, M., Beasley-Topliffe, L., Tesini, B., Liang, X., Valentine, C., Hellman, J., Hayden, D. et al. (2010). Resilience to bacterial infection: difference between species could be due to proteins in serum. *J. Infect. Dis.* **201**, 223-232.
- Yang, Y., Lv, J., Jiang, S., Ma, Z., Wang, D., Hu, W., Deng, C., Fan, C., Di, S. and Sun, Y. (2017). The emerging role of Toll-like receptor 4 in myocardial inflammation. *Cell Death Dis.* **7**, e2234.
- Yu, M., Zheng, X., Witschi, H. and Pinkerton, K. E. (2002). The role of interleukin-6 in pulmonary inflammation and injury induced by exposure to environmental air pollutants. *Toxicol. Sci.* **68**, 488-497.
- Zapol, W. M., Liggins, G. C., Schneider, R. C., Qvist, J., Snider, M. T., Creasy, R. K. and Hochachka, P. W. (1979). Regional blood flow during simulated diving in the conscious Weddell seal. *J. Appl. Physiol.* **47**, 968-973.
- Zenteno-Savín, T., Clayton-Hernandez, E. and Elsner, R. (2002). Diving seals: are they a model for coping with oxidative stress? *Comp. Biochem. Physiol. C Toxicol. Pharmacol.* **133**, 527-536.
- Zhao, H., Perez, J. S., Lu, K., George, A. J. T. and Ma, D. (2014). Role of Toll-like receptor-4 in renal graft ischemia-reperfusion injury. *Am. J. Physiol. Renal Physiol.* **306**, F801-F811.
